# Supplementary material
Source: publisher figshare collection journal article supplement (https://acs.figshare.com/ndownloader/files/3710203)
Supplement: Supplementary file 1 [file 3710203]

# SUPPORTING INFORMATION

## Interaction of CO<sub>2</sub> and CH<sub>4</sub> With Functionalized Periodic Mesoporous Phenylene–Silica: Periodic DFT Calculations and Gas Adsorption Measurements

*Mirtha A. O. Lourenço,<sup>a</sup> Christophe Siquet,<sup>b</sup> Mariana Sardo,<sup>c</sup> Luís Mafra,<sup>c</sup> João Pires,<sup>d</sup> Miguel Jorge,<sup>e</sup> Moisés L. Pinto,<sup>f</sup> Paula Ferreira,<sup>a\*</sup> José R. B. Gomes<sup>c\*</sup>*

<sup>a</sup>CICECO – Aveiro Institute of Materials, Department of Materials & Ceramics Engineering, University of Aveiro, 3810-193 Aveiro, Portugal

<sup>b</sup>LSRE-LCM Associate Laboratory, Faculty of Engineering, University of Porto, 4200-465 Porto, Portugal

<sup>c</sup>CICECO – Aveiro Institute of Materials, Department of Chemistry, University of Aveiro, 3810-193 Aveiro, Portugal

<sup>d</sup>CCB, Center of Chemistry and Biochemistry, Faculty of Sciences, University of Lisbon, 1749-016 Lisboa, Portugal

<sup>e</sup>Department of Chemical and Process Engineering, University of Strathclyde, 75 Montrose Street, Glasgow G1 1XJ, United Kingdom

<sup>f</sup>CERENA, Instituto Superior Técnico, University of Lisbon, Av. Rovisco Pais, n° 1, 1049-001 Lisboa, Portugal

## Table of Contents

### 1. PMO Materials' Characterization Procedures

### 2. Data From the Characterization of PMO Materials

**Table S1.** Physical properties of Ph-PMO, NH<sub>2</sub>-PMO, APTMS@Ph-PMO and APTMS@NH<sub>2</sub>-Ph-PMO.

**Figure S1.** X-ray diffraction patterns of Ph-PMO, NH<sub>2</sub>-PMO, APTMS@Ph-PMO and APTMS@NH<sub>2</sub>-Ph-PMO.

**Figure S2.** -196 °C nitrogen adsorption-desorption isotherms of Ph-PMO, NH<sub>2</sub>-PMO, APTMS@Ph-PMO and APTMS@NH<sub>2</sub>-Ph-PMO.

**Figure S3.** PSD curves of Ph-PMO, NH<sub>2</sub>-PMO, APTMS@Ph-PMO and APTMS@NH<sub>2</sub>-Ph-PMO.

**Figure S4.** <sup>29</sup>Si MAS (left) and CP-MAS (right) NMR spectra of Ph-PMO, NH<sub>2</sub>-PMO, APTMS@Ph-PMO and APTMS@NH<sub>2</sub>-Ph-PMO.

**Table S2.** Percentage of T<sup>m</sup> silanols species calculated from the fits of the <sup>29</sup>Si MAS NMR spectra.

**Figure S5.** FTIR (ATR) spectra of Ph-PMO, NH<sub>2</sub>-PMO, APTMS@Ph-PMO and APTMS@NH<sub>2</sub>-Ph-PMO.

**Figure S6.** TGA of Ph-PMO, NH<sub>2</sub>-PMO, APTMS@Ph-PMO and APTMS@NH<sub>2</sub>-Ph-PMO.

**Table S3.** Elemental analyses of Ph-PMO, NH<sub>2</sub>-PMO, APTMS@Ph-PMO and APTMS@NH<sub>2</sub>-Ph-PMO.

### 3. CO<sub>2</sub> and CH<sub>4</sub> Adsorption in the PMOs: Experimental and Computational Studies

**Figure S7.** Adsorbed amounts of the CO<sub>2</sub>/CH<sub>4</sub> mixture as a function of the CH<sub>4</sub> molar fraction in the gas phase for the selected PMO materials.

**Figure S8.** <sup>13</sup>C CP-MAS NMR spectra of NH<sub>2</sub>-PMO, APTMS@Ph-PMO and APTMS@NH<sub>2</sub>-Ph-PMO after material degassing.

**Table S4.** Virial coefficients and Henry constants (*K*) for the adsorption at 25 and 35 °C of methane and carbon dioxide on the APTMS@Ph-PMO

**Figure S9.** Adsorption equilibrium isotherms of CO<sub>2</sub> and CH<sub>4</sub> at 25 and 35 °C for the APTMS@Ph-PMO.

**Table S5.** Atomic distances between CO<sub>2</sub> and CH<sub>4</sub> with **R'** functionalized **R**-Ph-PMOs.

**Table S6.** Atomic distances between CO<sub>2</sub> and CH<sub>4</sub> with **R**-functionalized Ph-PMOs.

## 1. PMO Materials' Characterization Procedures

Powder X-ray diffraction (PXRD) data were acquired with a Rigaku Geigerflex D Max-C Series diffractometer using Cu-K $\alpha$  radiation.

Nitrogen adsorption-desorption isotherms were collected at -196 °C using a Gemini V 2.00 instrument model 2380. All PMO materials were dehydrated overnight at 200 °C to an ultimate pressure of 1024 mbar and then cooled to room temperature prior to adsorption.

$^{13}\text{C}$  and  $^{29}\text{Si}/^{15}\text{N}$  NMR spectra were recorded using a double resonance 4 mm and 7 mm MAS probe, respectively, on a Bruker Avance III 400 spectrometer operating at 9.4 T.  $^{13}\text{C}$  cross-polarization magic-angle spinning (CP-MAS) NMR spectra were collected using a 4  $\mu\text{s}$   $^1\text{H}$  90° pulse, a contact time (CT) of 1.5 ms, a spinning rate of 7-9 kHz and recycle delay (RD) of 5 s.  $^{29}\text{Si}$  MAS NMR spectra were collected employing a 40° flip angle pulse, a spinning rate of 5 kHz and RD of 60 s.  $^{29}\text{Si}$  CP-MAS NMR spectra were acquired employing a 4  $\mu\text{s}$   $^1\text{H}$  90° pulse, a CT of 8 ms, a spinning rate of 5 kHz and a RD of 5 s. The  $^{15}\text{N}$  CP-MAS spectra were acquired at a spinning rate of 7 kHz under the following experimental conditions:  $^1\text{H}$  and  $^{15}\text{N}$  90° pulses set to 3.2 and 7.3  $\mu\text{s}$  corresponding to a radio-frequency (RF) field strength of 78 and 34 kHz, respectively; the CP step was performed with a contact time of 2 ms with  $^1\text{H}$  and  $^{15}\text{N}$  RF field strength of 69 (50–100% RAMP-CP shape) and 34 kHz, respectively; RD of 5 s. During the acquisition, a SPINAL-64 decoupling scheme was used. The SPINAL-64 basic unit pulse length was set to 6.25  $\mu\text{s}$  at a RF field strength of 78 kHz.

The  $^{13}\text{C}$  and  $^{29}\text{Si}$  NMR spectra were quoted in ppm from trimethylsilane and  $^{15}\text{N}$  chemical shifts were externally referenced to the amine peak (-347.6 ppm) of glycine.

Thermogravimetric analyses (TGA) are made on a Shimadzu TGA-50 instrument with a program rate of 5 °C min $^{-1}$  in air.

Fourier transform infrared (FTIR) spectra were carried out in a FTIR Bruker Tensor 27 instrument with a Golden Gate ATR (Attenuated Total Reflectance). PMOs powders were dehydrated at 110 °C overnight before FTIR analysis. The FTIR spectra were collected in Absorbance mode.

Elemental analyses CHN were made with a TruSpec 630-200-200 CNHS Analyser. Analysis Parameters: sample amount between 1 and 2 mg; combustion furnace temperature = 1075 °C; afterburner temperature = 850 °C. Detection method: carbon - infrared absorption; hydrogen - infrared absorption, nitrogen – thermal conductivity.

## 2. Data From the Characterization of PMO Materials

**Table S1.** Physical properties of Ph-PMO, NH<sub>2</sub>-PMO, APTMS@Ph-PMO and APTMS@NH<sub>2</sub>-Ph-PMO.

| Sample                        | $d_{100}$ / nm | $a$ / nm <sup>a</sup> | $S_{\text{BET}}$ / m <sup>2</sup> g <sup>-1</sup> | $V_{\text{P}}$ / cm <sup>3</sup> g <sup>-1</sup> | $d_{\text{p}}$ / nm <sup>b</sup> | $b$ / nm <sup>c</sup> |
|-------------------------------|----------------|-----------------------|---------------------------------------------------|--------------------------------------------------|----------------------------------|-----------------------|
| Ph-PMO                        | 3.59           | 4.14                  | 1004                                              | 0.69                                             | 2.54                             | 1.60                  |
| NH <sub>2</sub> -PMO          | 3.63           | 4.19                  | 924                                               | 0.70                                             | 2.41                             | 1.78                  |
| APTMS@Ph-PMO                  | 3.34           | 3.92                  | 634                                               | 0.43                                             | 2.24                             | 1.68                  |
| APTMS@NH <sub>2</sub> -Ph-PMO | 3.50           | 4.04                  | 305                                               | 0.27                                             | 2.23                             | 1.81                  |

<sup>a</sup>Unit cell parameter calculated as  $(2d_{100}/\sqrt{3})$ . <sup>b</sup>Pore width obtained from the BJH method with the corrected Kelvin equation, i.e. KJS-BJH method at the maximum of pore size distribution calculated on the basis of adsorption data. <sup>c</sup>Pore wall thickness calculated as  $(2d_{100}/\sqrt{3} - d_{\text{p}})$ , where the first term is the unit cell parameter.

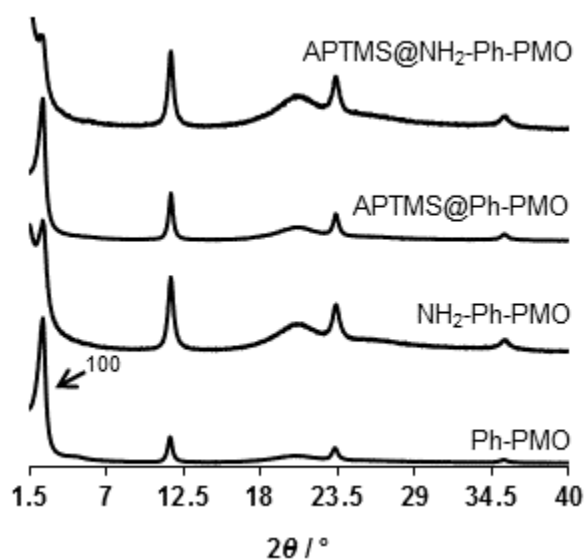

**Figure S1.** Powder X-ray diffraction patterns of Ph-PMO, NH<sub>2</sub>-PMO, APTMS@Ph-PMO and APTMS@NH<sub>2</sub>-Ph-PMO.

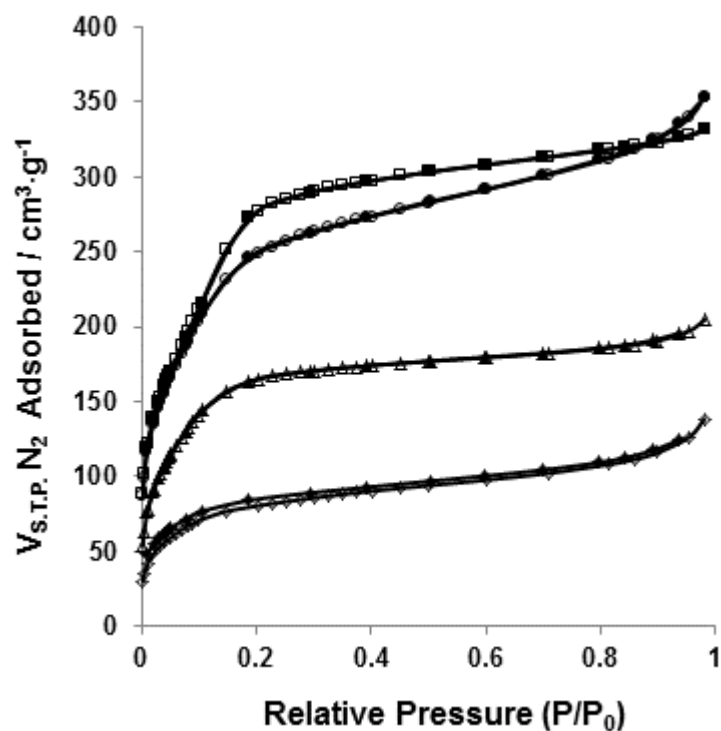

**Figure S2.** -196 °C N<sub>2</sub> isotherms of a) Ph-PMO ((□) adsorption, (■) desorption); NH<sub>2</sub>-Ph-PMO ((○) adsorption, (●) desorption); APTMS@Ph-PMO ((Δ) adsorption, (▲) desorption) and APTMS@NH<sub>2</sub>-Ph-PMO ((◇) adsorption, (◆) desorption).

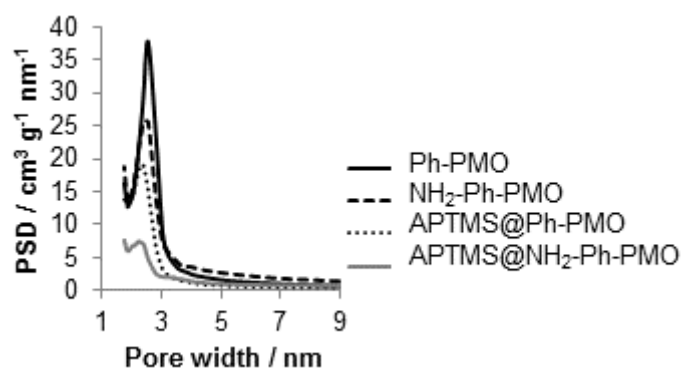

**Figure S3.** Pore size distribution curves of Ph-PMO, NH<sub>2</sub>-Ph-PMOs, APTMS@Ph-PMO and APTMS@NH<sub>2</sub>-Ph-PMO.

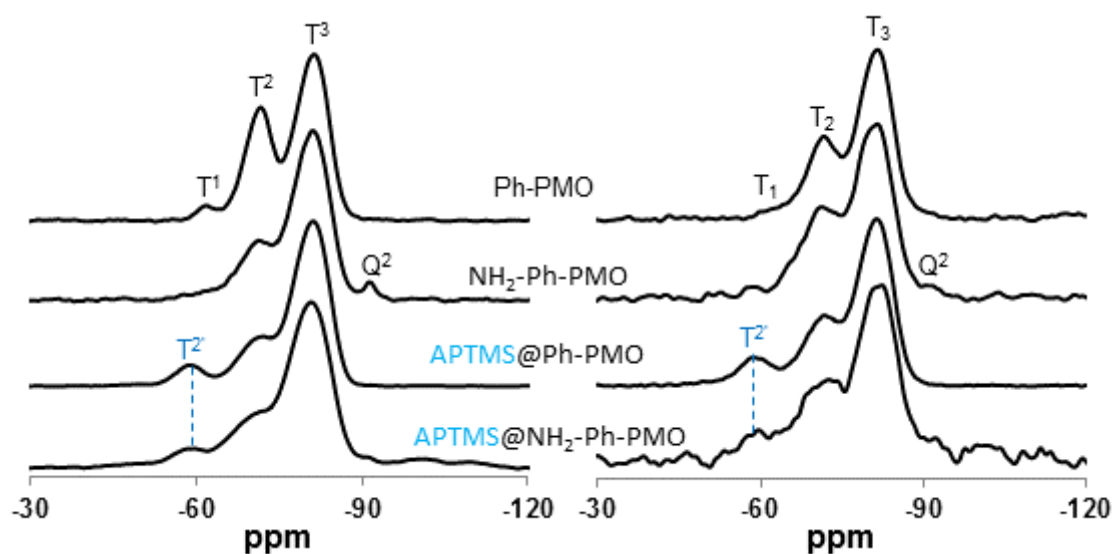

**Figure S4.**  $^{29}\text{Si}$  CP-MAS (left) and MAS (right) NMR spectra of Ph-PMO,  $\text{NH}_2$ -PMO, APTMS@Ph-PMO and APTMS@ $\text{NH}_2$ -Ph-PMO. Chemical shifts referenced from TMS.

**Table S2.** Percentage of  $\text{T}^{\text{m}}$  silanol species calculated from the fits of the  $^{29}\text{Si}$  MAS NMR spectra.

| PMO                          | % $\text{T}^1$ | % $\text{T}^2$ | % $\text{T}^3$ | % $\text{T}^{2^{\text{a}}}$ |
|------------------------------|----------------|----------------|----------------|-----------------------------|
| Ph-PMO                       | 2.02           | 31.40          | 66.58          | -                           |
| $\text{NH}_2$ -Ph-PMO        | 1.22           | 32.79          | 66.00          | -                           |
| APTMS@Ph-PMO                 | -              | 28.76          | 61.80          | 9.44                        |
| APTMS@ $\text{NH}_2$ -Ph-PMO | -              | 34.73          | 58.22          | 7.05                        |

<sup>a</sup>percentage of  $\text{T}^2$  silanols in the APTMS group.

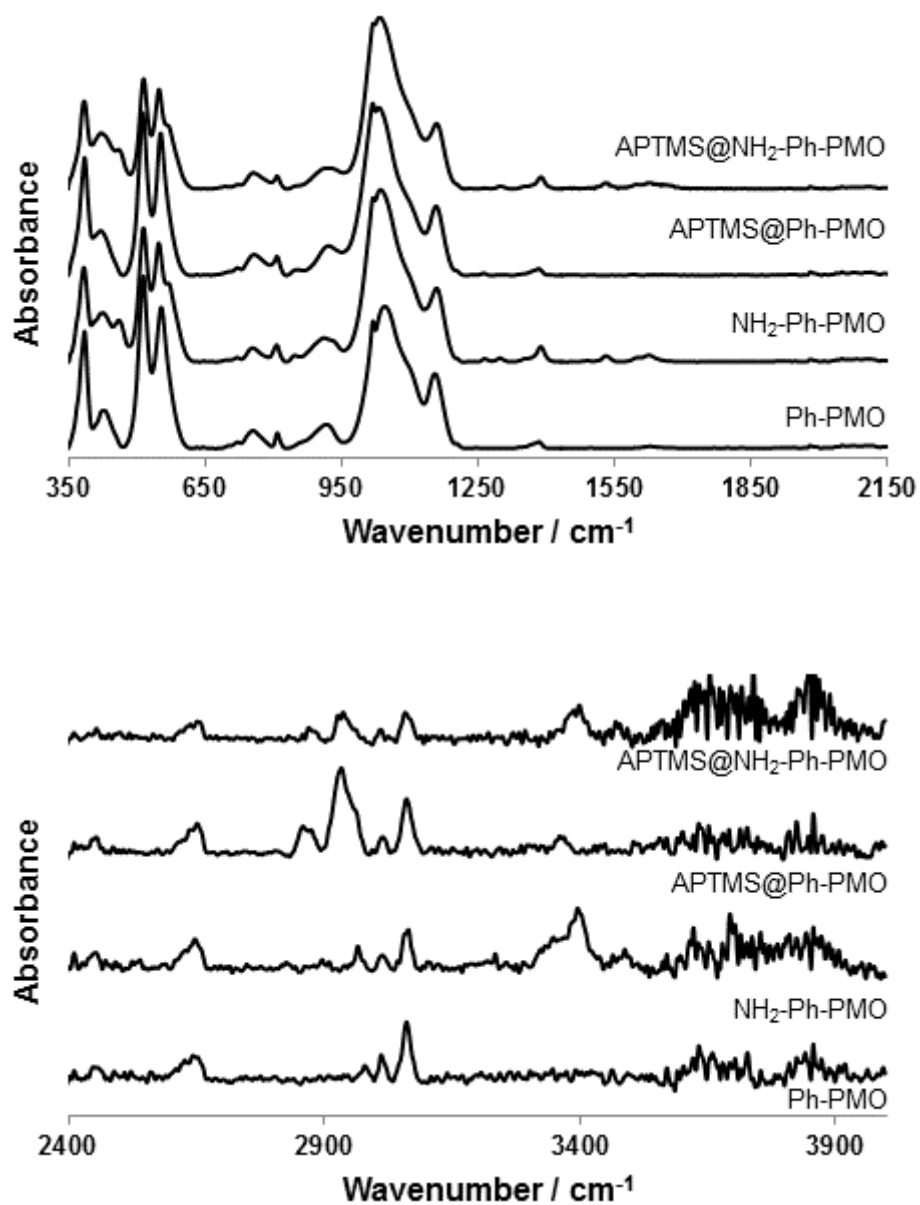

**Figure S5.** FTIR (ATR) spectra of Ph-PMO,  $\text{NH}_2$ -PMO, APTMS@Ph-PMO and APTMS@ $\text{NH}_2$ -Ph-PMO.

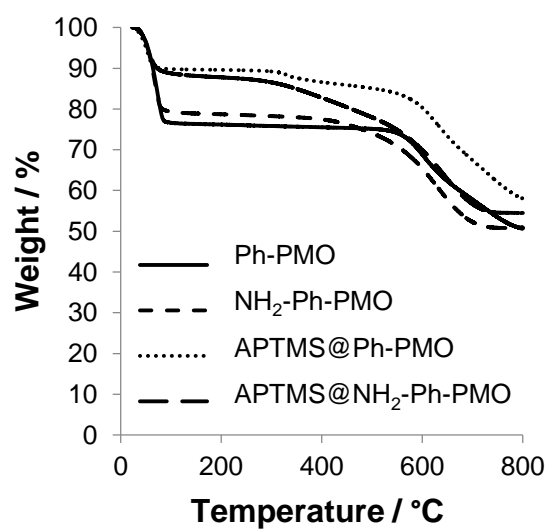

**Figure S6.** TGA of Ph-PMO, NH<sub>2</sub>-PMO, APTMS@Ph-PMO and APTMS@NH<sub>2</sub>-Ph-PMO.

**Table S3.** Elemental analyses and nitrogen densities of Ph-PMO, NH<sub>2</sub>-PMO, APTMS@Ph-PMO and APTMS@NH<sub>2</sub>-Ph-PMO.

| Sample                                     | %N   | %C    | %H   | N density /<br>mmol g <sup>-1</sup> |
|--------------------------------------------|------|-------|------|-------------------------------------|
| C <sub>12</sub> -PMO                       | -    | 37.21 | 2.53 | -                                   |
| NH <sub>2</sub> -C <sub>12</sub> -PMO      | 2.58 | 31.57 | 3.01 | 1.85                                |
| APTMS@C <sub>12</sub> -PMO                 | 1.93 | 34.08 | 3.38 | 1.39                                |
| APTMS@NH <sub>2</sub> C <sub>12</sub> -PMO | 3.64 | 32.53 | 3.51 | 2.60                                |



### 3. CO<sub>2</sub> and CH<sub>4</sub> Adsorption in the PMOs: Experimental and Computational Studies

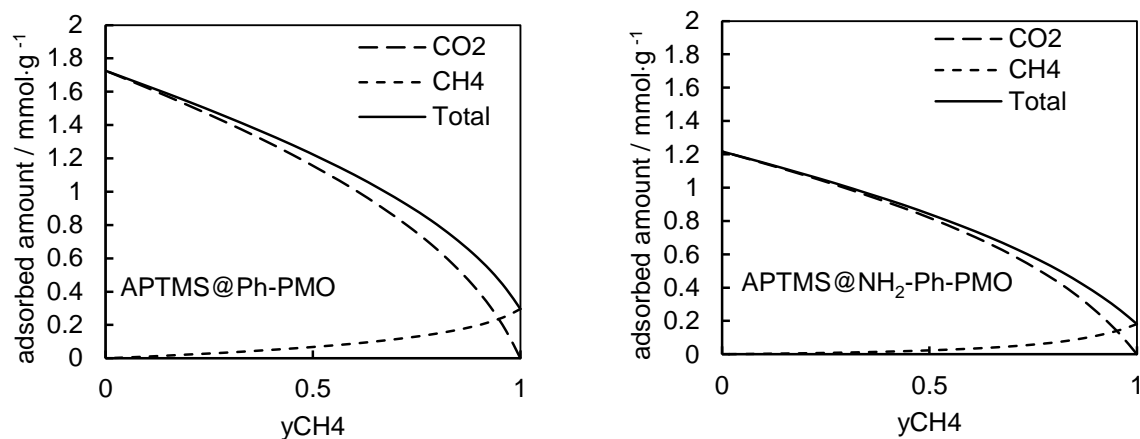

**Figure S7.** Adsorbed amounts of the CO<sub>2</sub>/CH<sub>4</sub> mixture as a function of the CH<sub>4</sub> molar fraction in the gas phase, at 500 kPa and 25°C, for APTMS-PMO materials.

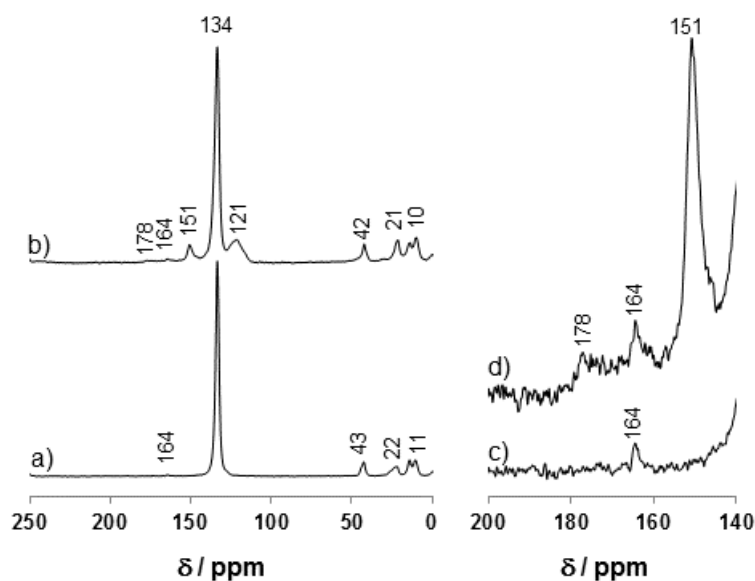

**Figure S8.** a) <sup>13</sup>C CP-MAS NMR spectra of a) APTMS@Ph-PMO and b) APTMS@NH<sub>2</sub>-Ph-PMO after material degassing; c) and d) correspond to the magnified 140-200 ppm region of APTMS@Ph-PMO and APTMS@NH<sub>2</sub>-Ph-PMO, respectively.

**Table S4.** Virial coefficients ( $C_1$ ,  $C_2$  and  $C_3$ ) and Henry constants ( $K$ ) for the adsorption at 25 °C and 35 °C of methane and carbon dioxide on APTMS@Ph-PMO.<sup>a</sup>

| Gas                                       | Temperature<br>°C | $K$<br>(mmol g <sup>-1</sup> kPa <sup>-1</sup> ) x<br>10 <sup>-2</sup> | $C_1$<br>g mmol <sup>-1</sup> | $C_2$<br>(g mmol <sup>-1</sup> ) <sup>2</sup> | $C_3$<br>(g mmol <sup>-1</sup> ) <sup>3</sup> |
|-------------------------------------------|-------------------|------------------------------------------------------------------------|-------------------------------|-----------------------------------------------|-----------------------------------------------|
| CH <sub>4</sub>                           | 35                | 0.08                                                                   | 1.230                         |                                               |                                               |
|                                           | 25                | 0.07                                                                   | 0.797                         |                                               |                                               |
| CO <sub>2</sub>                           | 35                | 1.80                                                                   | 2.812                         | -1.197                                        |                                               |
|                                           | 25                | 1.83                                                                   | 1.647                         | -0.476                                        | 0.048                                         |
| Ratio<br>CO <sub>2</sub> /CH <sub>4</sub> | 35                |                                                                        | 22.50                         |                                               |                                               |
|                                           | 25                |                                                                        | 26.1                          |                                               |                                               |

<sup>a</sup> Obtained by the nonlinear least-squares the virial equation to the adsorption data

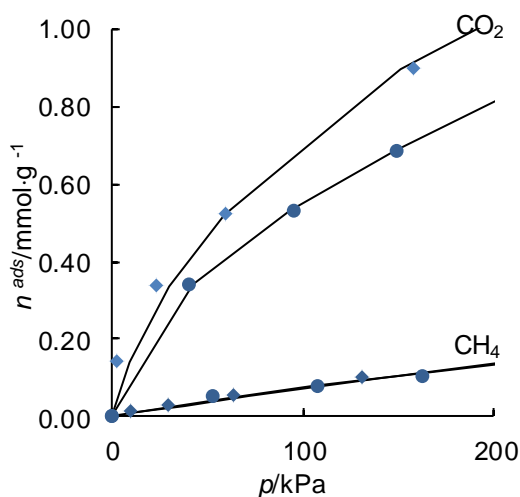

**Figure S9.** Adsorption equilibrium isotherms of CO<sub>2</sub> and CH<sub>4</sub> at 25 and 35 °C. Solid lines represent the fits to the Virial model. Labels ● correspond to the APTMS@Ph-PMO materials measured at 35 °C (1<sup>st</sup> utilization of the material) and ♦ correspond to the APTMS@Ph-PMO measured at 25 °C (2<sup>nd</sup> utilization of the material).

**Table S5.** Selected distances between atoms in the CO<sub>2</sub> and CH<sub>4</sub> adsorbates and in the parent and aminated Ph-PMO adsorbents.

|                                        | R'@R-Ph-PMO <sup>a</sup>  |                                   | Atomic distances / Å |                 |                 |                 |                 |                 |                 |                 |
|----------------------------------------|---------------------------|-----------------------------------|----------------------|-----------------|-----------------|-----------------|-----------------|-----------------|-----------------|-----------------|
|                                        |                           |                                   | CO <sub>2</sub>      |                 |                 | CH <sub>4</sub> |                 |                 |                 |                 |
|                                        |                           |                                   | O <sub>9</sub>       | C <sub>10</sub> | O <sub>11</sub> | C <sub>12</sub> | H <sub>13</sub> | H <sub>14</sub> | H <sub>15</sub> | H <sub>16</sub> |
| R' - Functionalized R-Ph-PMO Materials | -H / -H                   | H <sub>1</sub>                    |                      |                 |                 |                 | 3.61            |                 |                 |                 |
|                                        |                           | H <sub>2</sub>                    |                      |                 |                 | 3.33            |                 | 3.12            |                 |                 |
|                                        |                           | H <sub>3</sub>                    | 3.80                 | 4.33            |                 |                 |                 | 3.07            |                 |                 |
|                                        |                           | Si-O <sub>6</sub> -H <sub>5</sub> | 2.28                 |                 |                 |                 | 5.43            |                 |                 |                 |
|                                        |                           | Si-O <sub>7</sub> -Si             |                      |                 | 3.90            |                 |                 |                 | 3.15            |                 |
|                                        |                           | Si-O <sub>8</sub> -Si             |                      | 3.81            |                 |                 |                 |                 |                 |                 |
|                                        | -H / -NH <sub>2</sub>     | N-H <sub>17</sub>                 |                      |                 | 2.60            |                 |                 | 2.36            | 2.42            |                 |
|                                        |                           | N <sub>18</sub>                   |                      | 4.12            | 3.24            | 3.44            |                 |                 |                 |                 |
|                                        |                           | N-H <sub>19</sub>                 |                      |                 | 3.19            | 2.62            |                 | 2.65            |                 |                 |
|                                        |                           | H <sub>1</sub>                    | 2.87                 | 2.66            |                 |                 | 3.97            |                 |                 |                 |
|                                        |                           | Si-O <sub>6</sub> -H <sub>5</sub> | 2.45                 |                 |                 |                 | 4.84            |                 |                 |                 |
|                                        |                           | Si-O <sub>7</sub> -Si             |                      |                 | 4.68            |                 |                 |                 | 2.74            |                 |
|                                        |                           | Si-O <sub>8</sub> -Si             |                      | 2.96            |                 |                 |                 |                 | 2.74            |                 |
|                                        | -APTMS / -H               | H <sub>1</sub>                    |                      |                 | 5.32            |                 | 5.15            | 4.94            |                 |                 |
|                                        |                           | H <sub>2</sub>                    |                      |                 |                 |                 |                 |                 | 4.56            |                 |
|                                        |                           | H <sub>3</sub>                    | 7.02                 |                 | 7.53            |                 |                 | 6.72            |                 |                 |
|                                        |                           | Si-O <sub>7</sub> -Si             |                      |                 |                 |                 |                 |                 | 5.59            |                 |
|                                        |                           | H <sub>20</sub>                   | 2.75                 |                 |                 |                 |                 |                 | 2.64            |                 |
|                                        |                           | H <sub>21</sub>                   | 3.41                 |                 |                 |                 |                 |                 | 3.09            |                 |
|                                        |                           | H <sub>22</sub>                   |                      |                 |                 |                 | 3.16            |                 |                 |                 |
|                                        |                           | H <sub>25</sub>                   |                      |                 | 3.18            |                 |                 |                 |                 |                 |
|                                        |                           | N-H <sub>26</sub>                 | 4.14                 |                 |                 |                 |                 |                 |                 | 3.85            |
|                                        |                           | N <sub>27</sub>                   |                      | 2.99            |                 | 3.37            |                 |                 |                 |                 |
|                                        |                           | N-H <sub>28</sub>                 |                      |                 | 2.58            |                 |                 | 2.58            |                 | 2.75            |
|                                        |                           | Si-O-H <sub>29</sub>              | 3.23                 | 3.66            |                 |                 | 2.93            |                 |                 |                 |
|                                        | -APTMS / -NH <sub>2</sub> | H <sub>1</sub>                    | 3.57                 |                 |                 |                 |                 |                 |                 |                 |
|                                        |                           | H <sub>2</sub>                    |                      | 3.19            |                 |                 |                 | 3.80            |                 |                 |
|                                        |                           | H <sub>3</sub>                    | 6.05                 |                 |                 |                 |                 |                 |                 |                 |
|                                        |                           | Si-O <sub>7</sub> -Si             |                      |                 | 4.80            |                 |                 |                 |                 |                 |
|                                        |                           | N-H <sub>17</sub>                 | 4.51                 |                 |                 |                 |                 | 5.71            |                 |                 |
|                                        |                           | N <sub>18</sub>                   |                      | 5.04            |                 |                 |                 |                 |                 |                 |
|                                        |                           | N-H <sub>19</sub>                 | 4.78                 |                 | 4.54            |                 |                 |                 |                 |                 |
|                                        |                           | H <sub>20</sub>                   |                      |                 | 2.62            |                 |                 |                 |                 |                 |
|                                        |                           | H <sub>21</sub>                   |                      |                 | 2.76            |                 |                 |                 |                 |                 |
|                                        |                           | H <sub>22</sub>                   |                      |                 |                 |                 | 3.98            |                 |                 |                 |
|                                        |                           | H <sub>25</sub>                   | 3.25                 |                 |                 |                 |                 |                 | 3.64            |                 |
|                                        |                           | N-H <sub>26</sub>                 |                      |                 | 4.75            |                 |                 |                 |                 |                 |
|                                        |                           | N-H <sub>28</sub>                 |                      |                 | 4.21            |                 |                 |                 | 3.59            |                 |
|                                        |                           | Si-O-H <sub>29</sub>              | 2.45                 | 2.74            |                 |                 | 2.66            | 2.14            |                 |                 |
|                                        |                           | Si-O-H <sub>30</sub>              | 4.60                 |                 |                 |                 | 4.91            |                 |                 |                 |

<sup>a</sup>The reference atom for measuring the atomic distances appears in black.

**Table S6.** Selected atomic distances between CO<sub>2</sub> or CH<sub>4</sub> and the **R**-functionalized Ph-PMOs.

| R - Functionalized Ph-PMO Materials | R-Ph-PMO <sup>a</sup>            |                                   | Atomic distances / Å |                 |                 |                 |                 |                 |                 |                 |
|-------------------------------------|----------------------------------|-----------------------------------|----------------------|-----------------|-----------------|-----------------|-----------------|-----------------|-----------------|-----------------|
|                                     |                                  |                                   | CO <sub>2</sub>      |                 |                 | CH <sub>4</sub> |                 |                 |                 |                 |
|                                     |                                  |                                   | O <sub>9</sub>       | C <sub>10</sub> | O <sub>11</sub> | C <sub>12</sub> | H <sub>13</sub> | H <sub>14</sub> | H <sub>15</sub> | H <sub>16</sub> |
|                                     |                                  |                                   |                      |                 |                 |                 |                 |                 |                 |                 |
| R - Functionalized Ph-PMO Materials | -NO <sub>2</sub>                 | N-O <sub>31</sub>                 |                      | 3.30            | 3.30            |                 |                 | 2.74            |                 |                 |
|                                     |                                  | N <sub>32</sub>                   |                      | 4.57            |                 |                 |                 | 3.26            |                 |                 |
|                                     |                                  | N-O <sub>33</sub>                 |                      |                 | 4.44            |                 |                 | 3.76            |                 |                 |
|                                     |                                  | H <sub>1</sub>                    | 2.86                 |                 |                 | 3.07            | 2.25            |                 |                 |                 |
|                                     |                                  | H <sub>2</sub>                    | 4.07                 | 3.50            | 3.29            | 3.37            |                 | 2.65            |                 |                 |
|                                     |                                  | Si-O <sub>6</sub> -H <sub>5</sub> | 2.34                 |                 |                 |                 | 2.38            |                 |                 |                 |
|                                     |                                  | Si-O <sub>7</sub> -Si             | 4.21                 |                 |                 |                 |                 |                 | 3.44            |                 |
|                                     |                                  | Si-O <sub>8</sub> -Si             |                      |                 |                 |                 |                 |                 | 3.30            |                 |
|                                     | -NH- <i>i</i> -Pr                | N-H <sub>34</sub>                 |                      |                 | 2.81            |                 |                 |                 | 2.87            |                 |
|                                     |                                  | N <sub>35</sub>                   |                      | 3.66            |                 |                 |                 |                 |                 |                 |
|                                     |                                  | NH-C-H <sub>36</sub>              |                      | 3.58            | 3.36            |                 |                 |                 | 2.75            |                 |
|                                     |                                  | CH-C-H <sub>37</sub>              | 3.49                 |                 |                 |                 |                 | 3.48            |                 |                 |
|                                     |                                  | CH-C-H <sub>38</sub>              |                      |                 | 2.78            |                 |                 | 2.19            |                 | 3.16            |
|                                     |                                  | CH-C-H <sub>39</sub>              | 2.50                 |                 |                 |                 | 2.55            |                 |                 |                 |
|                                     |                                  | CH-C-H <sub>40</sub>              |                      |                 | 3.14            |                 | 2.19            |                 |                 |                 |
|                                     |                                  | H <sub>1</sub>                    | 2.62                 | 3.50            |                 |                 |                 |                 |                 | 4.20            |
|                                     |                                  | Si-O <sub>6</sub> -H <sub>5</sub> | 3.37                 |                 |                 |                 | 4.91            |                 |                 | 3.00            |
|                                     |                                  | Si-O <sub>7</sub> -Si             |                      | 2.87            |                 |                 |                 |                 | 2.28            |                 |
|                                     | -CH <sub>2</sub> NH <sub>2</sub> | C-H <sub>41</sub>                 |                      |                 | 3.16            |                 |                 |                 |                 | 2.99            |
|                                     |                                  | CH-N-H <sub>42</sub>              |                      |                 | 2.26            |                 |                 |                 | 2.77            | 2.60            |
|                                     |                                  | H <sub>1</sub>                    | 3.86                 |                 |                 |                 | 4.26            |                 |                 |                 |
|                                     |                                  | H <sub>2</sub>                    | 3.01                 |                 |                 |                 | 2.38            |                 |                 | 2.88            |
|                                     |                                  | Si-O <sub>6</sub> -H <sub>5</sub> | 2.38                 |                 |                 |                 | 2.54            |                 |                 |                 |
|                                     |                                  | Si-O <sub>7</sub> -Si             | 3.25                 |                 |                 |                 |                 |                 | 3.30            |                 |
|                                     |                                  | Si-O <sub>8</sub> -Si             |                      | 3.11            |                 |                 |                 |                 | 2.28            |                 |
|                                     | -SO <sub>3</sub> H               | S-O <sub>43</sub>                 |                      | 3.10            | 3.18            |                 |                 | 2.43            |                 |                 |
|                                     |                                  | S-O <sub>44</sub>                 |                      |                 | 4.76            |                 |                 |                 |                 |                 |
|                                     |                                  | S-O <sub>45</sub> H               |                      |                 | 3.38            |                 |                 | 3.15            |                 |                 |
|                                     |                                  | H <sub>1</sub>                    | 3.58                 |                 |                 |                 | 3.48            |                 |                 |                 |
|                                     |                                  | H <sub>2</sub>                    | 3.86                 |                 |                 |                 | 4.38            |                 |                 |                 |
|                                     |                                  | Si-O <sub>6</sub> -H <sub>5</sub> | 2.72                 |                 | 4.38            |                 | 2.95            |                 |                 |                 |
|                                     |                                  | Si-O <sub>7</sub> -Si             | 3.71                 |                 |                 |                 |                 |                 |                 |                 |
|                                     |                                  | Si-O <sub>8</sub> -Si             |                      | 4.03            |                 |                 |                 |                 | 3.03            |                 |

<sup>a</sup>The reference atom for measuring the atomic distances appears in black.
